# Supplementary material
Source: Springer Nature journal article supplement (https://www.springermedizin.de/resource/supplementary/12968_2013_3939_MOESM6_ESM.pdf/9584910)

**Large Vessel Segments**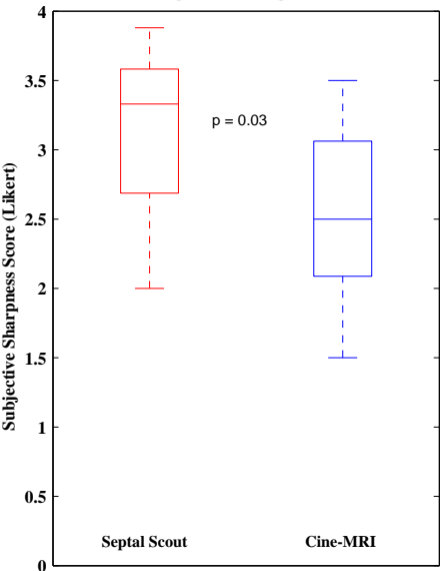**Small Vessel Segments**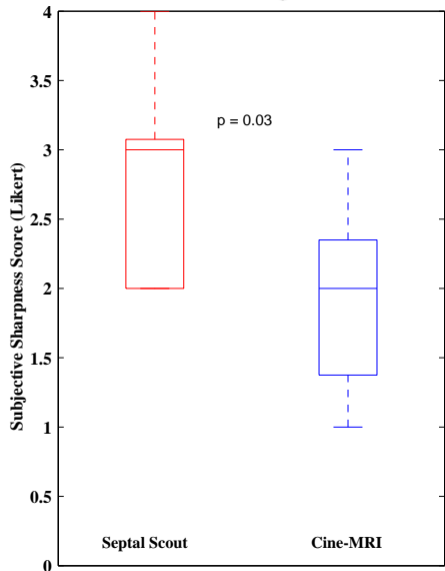

Supplement: MOESM6 [file 9584910]
